# Supplementary material
Source: PubMed Central journal article supplement (PMC7343287)
Supplement: es9b06089_si_001.pdf [file es9b06089_si_001.pdf]

## Supporting Information

# Chlorinated Paraffins in Human Milk from Urban Sites in China, Sweden, and Norway

Yihui Zhou<sup>1,2</sup>, Bo Yuan<sup>2\*</sup>, Elisabeth Nyberg<sup>3</sup>, Ge Yin<sup>2,4</sup>, Anders Bignert<sup>5</sup>, Anders Glynn<sup>6</sup>, Jon Øyvind Odland<sup>7</sup>, Yanling Qiu<sup>8</sup>, Yajie Sun<sup>1</sup>, Yongning Wu<sup>9</sup>, Qianfen Xiao<sup>1</sup>, Daqiang Yin<sup>8</sup>, Zhiliang Zhu<sup>8</sup>, Jianfu Zhao<sup>1</sup>, and Åke Bergman<sup>1,2,10</sup>

<sup>1</sup> State Key Laboratory of Pollution Control and Resource Reuse, College of Environmental Science and Engineering, Tongji University, Shanghai 200092, China

<sup>2</sup> Department of Environmental Science, Stockholm University, SE-106 91 Stockholm, Sweden

<sup>3</sup> Department of Contaminants, Swedish Environmental Protection Agency, Virkesvägen 2, SE-106 48 Stockholm

<sup>4</sup> Shimadzu Scientific Instrument Company, Shanghai, 200233, China

<sup>5</sup> Department of Environmental Monitoring and Research, Swedish Museum of Natural History, Box 50007, SE-104 15 Stockholm, Sweden

<sup>6</sup> Department of Biomedical Science and Veterinary Public Health, Swedish University of Agricultural Sciences (SLU), Box 7028, SE-75007 Uppsala, Sweden

<sup>7</sup> Faculty of Health Sciences, Norwegian University of Science and Technology, Postboks 8905, N-7491 Trondheim, Norway

<sup>8</sup> Key Laboratory of Yangtze River Water Environment (Ministry of Education), College of Environmental Science and Engineering, Tongji University, Shanghai 200092, China

<sup>9</sup> NHC Key Laboratory of Food Safety Risk Assessment, China National Center for Food Safety Risk Assessment, Beijing, 100021, China

<sup>10</sup> Department of Science and Technology, Örebro University, SE-701 82 Örebro, Sweden

\* Corresponding author address and e-mail:

Svante Arrhenius väg 8, SE-10691 Stockholm, Sweden; [bo.yuan@aces.su.se](mailto:bo.yuan@aces.su.se).

Pages: 24; Figures: 8; Tables: 6.

## Table of Contents

|                                                                                                                                                                                                          |    |
|----------------------------------------------------------------------------------------------------------------------------------------------------------------------------------------------------------|----|
| <b>Methods and Materials</b> .....                                                                                                                                                                       | 3  |
| <b>Sample storage</b> .....                                                                                                                                                                              | 3  |
| <b>Sample extraction and clean up</b> .....                                                                                                                                                              | 3  |
| <b>Instrumental analysis of CPs</b> .....                                                                                                                                                                | 4  |
| <br>                                                                                                                                                                                                     |    |
| <b>Table S1.</b> Theoretical number of positional isomers for polychlorinated <i>n</i> -alkanes .....                                                                                                    | 5  |
| <b>Table S2.</b> Detailed information and CP concentrations in human milk .....                                                                                                                          | 6  |
| <b>Table S3.</b> CP technical product list involved in the present study.....                                                                                                                            | 8  |
| <b>Table S4.</b> Relative Contributions of CP technical products in pattern reconstruction.....                                                                                                          | 9  |
| <b>Table S5.</b> Test statistics of Kruskal Wallis test grouped by sampling sites .....                                                                                                                  | 12 |
| <b>Table S6.</b> Estimated daily intake of CPs via breast-feeding of infants, and margin of exposure .....                                                                                               | 15 |
| <br>                                                                                                                                                                                                     |    |
| <b>Figure S1.</b> Map of sampling sites and sampling years.....                                                                                                                                          | 16 |
| <b>Figure S2.</b> Comparisons of carbon and chlorine profiles between blank and samples with CP concentrations between LOD and LOQ.....                                                                  | 17 |
| <b>Figure S3.</b> Composition profiles of SCCPs, MCCPs, and LCCPs in human milk .....                                                                                                                    | 18 |
| <b>Figure S4.</b> Compositional profiles of carbon chain homologs among the CPs.....                                                                                                                     | 19 |
| <b>Figure S5</b> Compositional profiles of the chlorine homolog series of CPs .....                                                                                                                      | 20 |
| <b>Figure S6.</b> Congener group patterns of chlorinated paraffins (CPs) in one human milk sample (Bodø-6) from Norway and one CP commercial product (MP57) from the European market .....               | 21 |
| <b>Figure S7.</b> Congener group patterns of chlorinated paraffins (CPs) in one human milk sample (Jiaxing-12) from Jiaxing, China and one CP commercial product (YS CP52) from the Chinese market ..... | 22 |
| <b>Figure S8.</b> Congener group patterns of chlorinated paraffins (CPs) in one human milk sample (Shaoxing-12) from Shaoxing, China and one CP commercial product (MP52) from the European market ..... | 23 |
| <br>                                                                                                                                                                                                     |    |
| <b>References</b> .....                                                                                                                                                                                  | 24 |

## Methods and Materials

### Sample storage

All samples were collected 2-12 weeks after giving birth. The target volume was at least 50 mL from each mother. Samples were subdivided into several portions and stored in the freezer below -18°C in glass bottles until chemical analysis. The Swedish samples were initially stored at -18°C in plastic bags and bottles. Upon being shipped to the Environmental Specimen Bank at the Swedish Museum of Natural History in Stockholm, samples were then thawed, transferred to pre-washed glass bottles with lids covered with aluminum foil, and stored at -20°C prior to analysis.

### Sample extraction and clean up

The denaturation and extraction method followed Fångström, et al.<sup>1</sup> with some minor modifications. <sup>13</sup>C<sub>10</sub>-1,5,5,6,6,10-hexachlorodecane (10 ng) was spiked as surrogate standard to the human milk samples (about 5 g) in a test tube (18 mL). The samples were homogenized with a solvent mixture of formic acid (6 M, 1 mL), isopropanol (6 mL) and diethyl ether mixed with n-hexane (6 mL, 1:1 v/v). After centrifugation for 5 minutes at 3000 rpm, the organic phase was transferred to a new tube (18 mL). The aquatic phase was extracted once more with isopropanol (1.5 mL) and diethyl ether/n-hexane (3 mL, 1:1 v/v). The combined organic phase was further washed twice with a sodium chloride solution (4 mL, 0.9%), whereas the aquatic phase was removed to a 15 mL tube. The combined aquatic phase was further extracted with diethyl ether/n-hexane (3 mL, 1:1 v/v) to get the analytes recovered to the organic phase. Finally, the combined organic phase was transferred to a pre-weighted beaker and lipid content was measured gravimetrically.

The lipids were dissolved with n-hexane (4 mL) in a test tube. Sulfuric acid (4 mL) was added to remove the lipids. The upper organic phase was taken out after inverting and centrifugation. The lower acid phase was partitioning once more with 4 mL n-hexane. The combined organic phase was concentrated to about 0.5 mL by a gentle nitrogen flow. A multi-layer column prepared in a Pasteur pipette packaged with activated silica gel (0.1) and silica gel impregnated with sulfuric acid (0.9 g, 2:1 w/w) from bottom to top was applied to further clean up. The column was preconditioned with n-hexane (3 mL), afterwards, the sample was applied to the column and eluted with n-hexane/dichloromethane (15 mL, 1:1 v/v). The collected solvent was evaporated to 1 mL by nitrogen flow. Silica gel column (deactivated with 3% water w/w, 4g, 0.063-0.2 mm Kieselgel 60) was applied to separate CPs from other nonpolar POPs described in detail elsewhere.<sup>2</sup> The column was conditioned by n-hexane (30 mL). The first fraction eluted with n-hexane (28 mL) was discarded to remove

nonpolar POPs such as PCBs and HCB. The second fraction containing CPs was collected with n-hexane/diethyl ether (30 mL, 3:1 v/v). Prior to instrumental analysis, Dechlorane 603 (10 ng) was added to samples as volumetric standard. Three empty tubes were prepared as field blanks in China and tested for possible contamination. One procedural blank was analyzed in parallel with each batch of five samples to assess any potential contamination through the laboratory work.

### **Instrumental analysis of CPs**

The recovery of  $^{13}\text{C}_{10}$ -1,5,5,6,6,10-hexachlorodecane was analyzed by a Varian 450 gas chromatograph equipped with an electron capture detector (GC-ECD) and a Varian CP-8400 auto-sampler. Injections (1  $\mu\text{L}$ ) were performed on a programmable temperature vaporizing (PTV) injector operating in splitless mode at a temperature of 250 °C. CP-Sil 5CB column (15 m x 0.25 mm i.d. x 0.25  $\mu\text{m}$  film thickness; Varian capillary column) was used. Helium and nitrogen were used as carrier gas and make-up gas, respectively. The column oven temperature program was set as: 80 °C hold for 2 min, 15 °C/min to 300°C and hold for 8 min. Native CPs in human milk samples were analyzed using direct injection dichloromethane-enhanced APCI-QTOF-MS (QTOF Premier, Waters, UK) with same instrumental settings described in a previous study.<sup>3</sup> We screened chloride adduct ions of 280 CP congener groups from  $\text{C}_9\text{H}_{17}\text{Cl}_3$  to  $\text{C}_{31}\text{H}_{52}\text{Cl}_{14}$  ( $\text{C}_{9-31}$ ,  $\text{Cl}_{2-14}$ ) in individual samples.  $\text{C}_9$  and up to  $\text{C}_{27}$  CPs were confirmed. Instrumental responses of the CP congener groups represented their profile of each sample.

We compared CP chain length ranges in the samples with those in a set of CP technical products ( $n = 65$ ) and selected a sub-set of 16 products (Table S3) for quantification in this study, consisting of 5 SCCPs, 6 MCCPs, and 5 LCCPs. The CP congener group profile of each human milk samples was reconstructed by a deconvolution algorithm<sup>4</sup> from the profiles of the selected technical products. Then percentage contributions of the technical products were used to calculate instrumental response factors of SCCPs, MCCPs, and LCCPs in the sample. Here concentrations of  $\text{C}_9$  CPs were included in those of SCCPs, as they were considered as impurities of SCCPs.<sup>5</sup> The performance of CP quantification was evaluated by the goodness of fit ( $R^2$ ) between the reconstructed profile and the native one.  $R^2 \geq 0.50$  indicates a valid quantification.<sup>4, 6</sup> Quantification of all samples fulfilled the criterion (Table S4).

**Table S1.** Theoretical number of positional isomers for polychlorinated *n*-alkanes by assuming no more than one chlorine atom bound to any carbon atom. The calculation is based on Tomy et al. (1997).<sup>7</sup> CP congeners are defined as individual chemicals identified by its exact structure, chirality not applied.

| Chain length | $C_nH_{2n+2-m}Cl_m, m =$ | Total number of positional congeners |
|--------------|--------------------------|--------------------------------------|
| 10           | 1-10                     | 527                                  |
| 11           | 1-11                     | 1 055                                |
| 12           | 1-12                     | 2 079                                |
| 13           | 1-13                     | 4 159                                |
| 14           | 1-14                     | 8 255                                |
| 15           | 1-15                     | 16 511                               |
| 16           | 1-16                     | 32 895                               |
| 17           | 1-17                     | 65 791                               |
| 18           | 1-18                     | 131 327                              |
| 19           | 1-19                     | 262 655                              |
| 20           | 1-20                     | 524 799                              |
| 21           | 1-21                     | 1 049 599                            |
| 22           | 1-22                     | 2 098 175                            |
| 23           | 1-23                     | 4 196 351                            |
| 24           | 1-24                     | 8 390 655                            |
| 25           | 1-25                     | 16 781 311                           |
| 26           | 1-26                     | 33 558 527                           |
| 27           | 1-27                     | 67 117 055                           |
| 28           | 1-28                     | 134 225 919                          |
| 29           | 1-29                     | 268 451 839                          |
| 30           | 1-30                     | 536 887 295                          |

**Table S2.** Detailed information and CP concentrations in human milk from Shanghai, Jiaxing, Shaoxing (China), Stockholm (Sweden), and Bodø (Norway).

| Sample ID   | Sampling Date (yyyy) | Age of Mother (year) | Duration <sup>a</sup> (year) | Occupation        | Age of child <sup>b</sup> (day) | No. of children <sup>c</sup> | SCCPs (ng g <sup>-1</sup> fat) | MCCPs (ng g <sup>-1</sup> fat) | LCCPs (ng g <sup>-1</sup> fat) |
|-------------|----------------------|----------------------|------------------------------|-------------------|---------------------------------|------------------------------|--------------------------------|--------------------------------|--------------------------------|
| Shanghai-1  | 2015                 | 30                   | 10                           | Financial staff   | 39                              | 1                            | 664                            | 1260                           | 56.9                           |
| Shanghai-2  | 2015                 | 38                   | 8                            | Staff             | 47                              | 2                            | 33.4                           | 37.9                           | 15.0                           |
| Shanghai-3  | 2015                 | 28                   | 7                            | Planning designer | 52                              | 2                            | 25.6                           | 66.2                           | 11.8                           |
| Shanghai-4  | 2015                 | 31                   | 9                            | Editor            | 34                              | 2                            | 89.2                           | 129                            | 16.9                           |
| Shanghai-5  | 2016                 | 25                   | 6                            | financial staff   | 43                              | 1                            | 19.9                           | 50.9                           | 20.8                           |
| Shanghai-6  | 2016                 | 31                   | 31                           | Architect         | 74                              | 1                            | 676                            | 192                            | <LOD                           |
| Shanghai-7  | 2016                 | 32                   | 16                           | Teacher           | 54                              | 2                            | 36.6                           | 76.3                           | 1.83                           |
| Shanghai-8  | 2016                 | 36                   | 27                           | NA                | 46                              | 1                            | 16.8                           | 73.9                           | 7.44                           |
| Shanghai-9  | 2016                 | 24                   | 24                           | NA                | NA                              | 1                            | 14.8                           | 59.8                           | 9.10                           |
| Shanghai-10 | 2016                 | 27                   | 27                           | NA                | NA                              | 1                            | 38                             | 56.4                           | 3.49                           |
| Jiaxing-1   | 2015                 | 30                   | 10                           | Financial staff   | 59                              | 2                            | 16.7                           | 32.3                           | 12.4                           |
| Jiaxing-2   | 2015                 | 28                   | 28                           | Freelance         | 34                              | 2                            | 134                            | 153                            | 3.18                           |
| Jiaxing-3   | 2015                 | 39                   | 39                           | Freelance         | 49                              | 2                            | 140                            | 70.1                           | 18.4                           |
| Jiaxing-4   | 2015                 | 35                   | 12                           | Policeman         | 40                              | 2                            | 28.6                           | 63                             | 6.12                           |
| Jiaxing-5   | 2015                 | 29                   | 29                           | Bank employee     | 47                              | 1                            | 467                            | 246                            | 8.01                           |
| Jiaxing-6   | 2015                 | 26                   | 26                           | NA                | 40                              | 2                            | 21.9                           | 51.3                           | 8.71                           |
| Jiaxing-7   | 2016                 | 40                   | 40                           | Freelance         | 26                              | 2                            | 18.7                           | 48.6                           | 5.23                           |
| Jiaxing-8   | 2016                 | 28                   | 28                           | Staff             | 57                              | 1                            | 11.6                           | 35.3                           | 3.14                           |
| Jiaxing-9   | 2016                 | 27                   | 27                           | Accountant        | 45                              | 1                            | 620                            | 263                            | 1.53                           |
| Jiaxing-10  | 2016                 | 28                   | 28                           | Teacher           | 51                              | 1                            | 642                            | 335                            | <LOD                           |
| Jiaxing-11  | 2016                 | 30                   | 30                           | Teacher           | 38                              | 1                            | 17.9                           | 28.0                           | <LOD                           |
| Jiaxing-12  | 2016                 | 40                   | 21                           | NA                | 43                              | 2                            | 171                            | 547                            | <LOD                           |
| Jiaxing-13  | 2016                 | 28                   | 28                           | Staff             | 29                              | 2                            | <LOD                           | 16.1                           | 6.79                           |
| Shaoxing-1  | 2010                 | 20-25                | >10                          | NA                | NA                              | 1                            | 21.2                           | 53.1                           | 46.9                           |
| Shaoxing-2  | 2010                 | 20-25                | >10                          | NA                | NA                              | 1                            | 31.9                           | 55.9                           | 4.89                           |
| Shaoxing-3  | 2010                 | 20-25                | >10                          | NA                | NA                              | 1                            | 28.7                           | 89.7                           | 15.7                           |
| Shaoxing-4  | 2010                 | 20-25                | >10                          | NA                | NA                              | 1                            | <LOD                           | 37.5                           | 9.91                           |
| Shaoxing-5  | 2010                 | 20-25                | >10                          | NA                | NA                              | 1                            | 81.2                           | 132                            | 7.94                           |
| Shaoxing-6  | 2010                 | 20-25                | >10                          | NA                | NA                              | 1                            | 66.1                           | 121                            | 184                            |
| Shaoxing-7  | 2010                 | 20-25                | >10                          | NA                | NA                              | 1                            | 37.9                           | 123                            | 12.6                           |
| Shaoxing-8  | 2010                 | 20-25                | >10                          | NA                | NA                              | 1                            | 64.7                           | 121                            | 14.6                           |
| Shaoxing-9  | 2010                 | 20-25                | >10                          | NA                | NA                              | 1                            | 124                            | 187                            | 22.8                           |
| Shaoxing-10 | 2010                 | 20-25                | >10                          | NA                | NA                              | 1                            | 43.5                           | 86.0                           | 120                            |
| Shaoxing-11 | 2010                 | 20-25                | >10                          | NA                | NA                              | 1                            | 52.5                           | 125                            | 7.94                           |
| Shaoxing-12 | 2010                 | 20-25                | >10                          | NA                | NA                              | 1                            | 17.3                           | 139                            | 8.90                           |
| Shaoxing-13 | 2010                 | 20-25                | >10                          | NA                | NA                              | 1                            | <LOD                           | 81.3                           | 15.3                           |

| Sample ID        | Sampling Date (yyyy) | Age of Mother (year) | Duration <sup>a</sup> (year) | Occupation            | Age of child <sup>b</sup> (day) | No. of children <sup>c</sup> | SCCPs (ng g <sup>-1</sup> fat) | MCCPs (ng g <sup>-1</sup> fat) | LCCPs (ng g <sup>-1</sup> fat) |
|------------------|----------------------|----------------------|------------------------------|-----------------------|---------------------------------|------------------------------|--------------------------------|--------------------------------|--------------------------------|
| Stockholm2016-1  | 2016                 | 34                   | >10                          | NA                    | NA                              | 1                            | <LOD                           | 21.1                           | 7.46                           |
| Stockholm2016-2  | 2016                 | 27                   | >10                          | NA                    | NA                              | 1                            | 20.0                           | 19.2                           | 4.53                           |
| Stockholm2016-3  | 2016                 | 31                   | >10                          | NA                    | NA                              | 1                            | <LOD                           | 21.0                           | <LOD                           |
| Stockholm2016-4  | 2016                 | 31                   | >10                          | NA                    | NA                              | 1                            | 13.8                           | <LOD                           | 1.65                           |
| Stockholm2016-5  | 2016                 | 26                   | >10                          | NA                    | NA                              | 1                            | 11.7                           | 27.4                           | 1.70                           |
| Stockholm2016-6  | 2016                 | 26                   | >10                          | NA                    | NA                              | 1                            | 27.8                           | 17.2                           | 9.34                           |
| Stockholm2016-7  | 2016                 | 25                   | >10                          | NA                    | NA                              | 1                            | <LOD                           | 60                             | 8.32                           |
| Stockholm2016-8  | 2016                 | 27                   | >10                          | NA                    | NA                              | 1                            | <LOD                           | 29.6                           | 2.80                           |
| Stockholm2016-9  | 2016                 | 27                   | >10                          | NA                    | NA                              | 1                            | <LOD                           | 19.1                           | <LOD                           |
| Stockholm2011-1  | 2011                 | 30                   | >10                          | NA                    | NA                              | 1                            | 23.3                           | 71                             | 21.4                           |
| Stockholm2011-2  | 2011                 | 31                   | >10                          | NA                    | NA                              | 1                            | 15.4                           | 26.9                           | 4.43                           |
| Stockholm2011-3  | 2011                 | 31                   | >10                          | NA                    | NA                              | 1                            | 15.8                           | 36.7                           | 4.14                           |
| Stockholm2011-4  | 2011                 | 31                   | >10                          | NA                    | NA                              | 1                            | 14.0                           | 17.3                           | <LOD                           |
| Stockholm2011-5  | 2011                 | 30                   | >10                          | NA                    | NA                              | 1                            | 12.9                           | 34.7                           | 8.92                           |
| Stockholm2011-6  | 2011                 | 31                   | >10                          | NA                    | NA                              | 1                            | 24.1                           | 77.7                           | 6.58                           |
| Stockholm2011-7  | 2011                 | 30                   | >10                          | NA                    | NA                              | 1                            | 19.0                           | 38.0                           | 1.84                           |
| Stockholm2011-8  | 2011                 | 29                   | >10                          | NA                    | NA                              | 1                            | 18.8                           | 19.2                           | 1.50                           |
| Stockholm2011-9  | 2011                 | 30                   | >10                          | NA                    | NA                              | 1                            | 11.8                           | 53.7                           | 5.26                           |
| Stockholm2011-10 | 2011                 | 31                   | >10                          | NA                    | NA                              | 1                            | 14.4                           | 42.1                           | 3.01                           |
| Bodø-1           | 2014                 | 37                   | >10                          | Cashier               | 77                              | NA                           | <LOD                           | <LOD                           | <LOD                           |
| Bodø-2           | 2014                 | 27                   | >10                          | Store's manager       | 84                              | NA                           | 120                            | 88.3                           | 29                             |
| Bodø-3           | 2014                 | 40                   | 3.5                          | Network Administrator | 84                              | NA                           | <LOD                           | 52.4                           | 4.35                           |
| Bodø-4           | 2014                 | 32                   | >10                          | DNB bank ASA          | 150                             | NA                           | <LOD                           | 16.4                           | 2.46                           |
| Bodø-5           | 2014                 | 30                   | 10                           | Barber                | NA                              | NA                           | 22.3                           | 28.3                           | 4.95                           |
| Bodø-6           | 2014                 | 39                   | >10                          | Accountant            | 63                              | NA                           | <LOD                           | 311                            | <LOD                           |
| Bodø-7           | 2014                 | 36                   | >10                          | Barber                | 98                              | NA                           | 24.3                           | 35.5                           | 10.8                           |
| Bodø-8           | 2014                 | 41                   | >10                          | Dentist               | 70                              | NA                           | 20.4                           | 50.6                           | 4.17                           |

<sup>a</sup> number of years living at the current place of residence;

<sup>b</sup> time of sampling after parturition

<sup>c</sup> number of children.

NA: not available.

LODs of SCCPs, MCCPs, and LCCPs are 11.5, 15.7, and 1.09 ng g<sup>-1</sup> fat in this study, respectively.

**Table S3.** CP technical product list involved in the present study.

| <i>Category</i> | <i>Product</i> | <i>Manufacturer</i>  | <i>Country</i> | <i>Ingredients*</i>         |
|-----------------|----------------|----------------------|----------------|-----------------------------|
| SCCPs           | SCCP 51.5 %Cl  | Ehrenstorfer GmbH    | Germany        | C <sub>10-13</sub> 51.5% Cl |
|                 | SCCP 55.5 %Cl  | Ehrenstorfer GmbH    | Germany        | C <sub>10-13</sub> 55.5% Cl |
|                 | SCCP 63.0 %Cl  | Ehrenstorfer GmbH    | Germany        | C <sub>10-13</sub> 63.0% Cl |
|                 | Witaclor 149   | Dynamit Nobel AG     | Germany        | C <sub>10-13</sub> 49% Cl   |
|                 | Hüls 70C       | Hüls AG              | Germany        | C <sub>10-13</sub> 70% Cl   |
| MCCPs           | MP42           | Ehrenstorfer GmbH    | Germany        | C <sub>14-17</sub> 42.0% Cl |
|                 | MP52           | Ehrenstorfer GmbH    | Germany        | C <sub>14-17</sub> 52.0% Cl |
|                 | MP57           | Ehrenstorfer GmbH    | Germany        | C <sub>14-17</sub> 57.0% Cl |
|                 | Cloparin 49st  | Caffaro              | Italy          | C <sub>14-17</sub> 49% Cl   |
|                 | Cloparin 50    | Caffaro              | Italy          | C <sub>14-17</sub> 50% Cl   |
|                 | CereclorS52    | INEOS Chlor Ltd.     | UK             | C <sub>14-17</sub> 52% Cl   |
|                 | YS CP52        | unknown              | China          | C <sub>14</sub> 52% Cl      |
| LCCPs           | Hüls 40N       | Hüls AG              | Germany        | C <sub>18-26</sub> 40% Cl   |
|                 | Witaclor 549   | Dynamit Nobel AG     | Germany        | C <sub>18-25</sub> 49% Cl   |
|                 | Unichlor 40    | Neville Chemical Co. | USA            | C <sub>22-27</sub> 40 %Cl   |
|                 | LCCP 36.0 %Cl  | Ehrenstorfer GmbH    | Germany        | C <sub>18-20</sub> 36.0% Cl |
|                 | LCCP 49.0 %Cl  | Ehrenstorfer GmbH    | Germany        | C <sub>18-20</sub> 49.0% Cl |

\* specifications from the manufacturer.



**Table S4.** Relative Contributions of CP technical products in pattern reconstruction of individual human milk samples.

| <i>Site</i> | <i>R</i> <sup>2</sup> | <i>SCCP 51.5%CI</i> | <i>SCCP 55.5%CI</i> | <i>SCCP 63.0%CI</i> | <i>Witactor 149</i> | <i>Hüls 70C</i> | <i>MP42</i> | <i>MP52</i> | <i>MP57</i> | <i>Cloparin 49st</i> | <i>Cloparin 50</i> | <i>Cereclor S52</i> | <i>LCCP 36%CI</i> | <i>LCCP 49%CI</i> | <i>Witactor 549</i> | <i>Hüls 40N</i> | <i>Uniclor 40</i> |
|-------------|-----------------------|---------------------|---------------------|---------------------|---------------------|-----------------|-------------|-------------|-------------|----------------------|--------------------|---------------------|-------------------|-------------------|---------------------|-----------------|-------------------|
| Shanghai-1  | 0.76                  | 7%                  | 9%                  | 0%                  | 18%                 |                 | 24%         | 16%         |             | 23%                  |                    |                     | 2%                | 0%                |                     |                 |                   |
| Shanghai-2  | 0.87                  |                     | 35%                 | 7%                  |                     | 1%              | 1%          | 29%         |             | 2%                   | 13%                |                     | 1%                | 11%               | 3%                  |                 |                   |
| Shanghai-3  | 0.89                  |                     | 29%                 | 4%                  | 0%                  | 0%              | 11%         | 46%         |             |                      |                    |                     | 3%                | 5%                | 1%                  |                 |                   |
| Shanghai-4  | 0.51                  |                     | 30%                 | 8%                  | 1%                  |                 | 3%          | 43%         |             | 3%                   | 5%                 |                     |                   | 7%                |                     |                 |                   |
| Shanghai-5  | 0.78                  | 3%                  | 21%                 | 3%                  | 1%                  | 2%              |             | 45%         |             |                      | 7%                 |                     |                   | 17%               |                     |                 |                   |
| Shanghai-6  | 0.57                  |                     |                     | 3%                  | 43%                 |                 | 14%         | 9%          | 21%         |                      | 9%                 |                     |                   |                   |                     |                 | 0%                |
| Shanghai-7  | 0.87                  |                     | 19%                 | 3%                  | 3%                  | 0%              | 14%         |             | 56%         | 5%                   |                    |                     |                   | 1%                |                     |                 |                   |
| Shanghai-8  | 0.84                  | 22%                 |                     | 2%                  |                     | 0%              | 3%          | 60%         |             | 1%                   | 5%                 |                     |                   | 6%                |                     |                 |                   |
| Shanghai-9  | 0.82                  | 0%                  | 12%                 | 5%                  | 10%                 | 1%              | 25%         |             | 28%         | 14%                  |                    |                     | 2%                | 2%                |                     |                 |                   |
| Shanghai-10 | 0.78                  |                     | 11%                 | 2%                  | 18%                 | 0%              | 21%         |             | 20%         |                      | 27%                |                     |                   | 1%                |                     |                 |                   |
| Jiaxing-1   | 0.77                  | 0%                  | 17%                 | 5%                  | 11%                 |                 | 12%         | 28%         |             |                      | 11%                |                     | 15%               | 2%                |                     |                 |                   |
| Jiaxing-2   | 0.50                  |                     | 12%                 | 4%                  | 22%                 |                 | 41%         |             | 18%         |                      |                    |                     |                   | 3%                |                     |                 |                   |
| Jiaxing-3   | 0.68                  |                     | 26%                 | 2%                  | 31%                 |                 | 4%          | 7%          |             |                      | 22%                |                     |                   | 8%                |                     |                 |                   |
| Jiaxing-4   | 0.88                  | 1%                  | 27%                 | 0%                  | 3%                  | 1%              | 22%         | 27%         |             |                      | 14%                |                     |                   | 5%                |                     |                 |                   |
| Jiaxing-5   | 0.67                  |                     | 11%                 | 2%                  | 51%                 |                 | 13%         | 16%         |             |                      | 6%                 |                     |                   | 1%                |                     |                 |                   |
| Jiaxing-6   | 0.89                  |                     | 15%                 | 6%                  | 7%                  |                 | 22%         |             | 40%         | 5%                   |                    |                     | 1%                | 3%                |                     |                 |                   |
| Jiaxing-7   | 0.88                  | 0%                  | 16%                 | 5%                  | 5%                  | 2%              | 21%         |             | 39%         | 2%                   | 6%                 |                     |                   | 3%                |                     |                 |                   |
| Jiaxing-8   | 0.83                  |                     | 18%                 | 0%                  | 6%                  | 1%              | 7%          |             | 34%         | 0%                   | 32%                |                     |                   | 2%                |                     |                 |                   |
| Jiaxing-9   | 0.68                  |                     |                     | 1%                  | 55%                 |                 | 30%         | 12%         | 1%          |                      |                    |                     |                   | 0%                |                     |                 |                   |
| Jiaxing-10  | 0.50                  |                     | 16%                 | 5%                  | 34%                 |                 | 32%         |             | 14%         |                      |                    |                     |                   |                   |                     |                 |                   |
| Jiaxing-11  | 0.74                  |                     | 22%                 | 5%                  | 14%                 | 5%              | 27%         | 16%         |             |                      | 10%                |                     |                   | 1%                |                     |                 |                   |
| Jiaxing-12  | 0.91                  |                     | 15%                 | 3%                  |                     |                 | 9%          |             | 73%         |                      |                    |                     |                   | 0%                |                     |                 |                   |
| Jiaxing-13  | 0.89                  | 0%                  | 17%                 | 6%                  | 4%                  | 0%              | 4%          |             | 44%         | 5%                   | 13%                |                     |                   | 6%                |                     | 0%              |                   |

| <i>Site</i>     | <i>R<sup>2</sup></i> | <i>SCCP 51.5%CI</i> | <i>SCCP 55.5%CI</i> | <i>SCCP 63.0%CI</i> | <i>Witaclor 149</i> | <i>Hüls 70C</i> | <i>MP42</i> | <i>MP52</i> | <i>MP57</i> | <i>Cloparin 49st</i> | <i>Cloparin 50</i> | <i>Cereclor S52</i> | <i>LCCP 36%CI</i> | <i>LCCP 49%CI</i> | <i>Witaclor 549</i> | <i>Hüls 40N</i> | <i>Uniclor 40</i> |
|-----------------|----------------------|---------------------|---------------------|---------------------|---------------------|-----------------|-------------|-------------|-------------|----------------------|--------------------|---------------------|-------------------|-------------------|---------------------|-----------------|-------------------|
| Shaoxing-1      | 0.86                 |                     | 19%                 | 4%                  | 1%                  | 2%              | 2%          | 16%         |             |                      | 26%                |                     |                   | 28%               | 2%                  |                 |                   |
| Shaoxing-2      | 0.88                 |                     | 29%                 | 7%                  | 1%                  |                 |             | 55%         |             |                      |                    |                     |                   | 9%                |                     |                 |                   |
| Shaoxing-3      | 0.89                 | 13%                 | 5%                  | 4%                  | 0%                  | 1%              |             | 62%         |             | 1%                   |                    |                     | 0%                | 9%                | 4%                  | 1%              |                   |
| Shaoxing-4      | 0.84                 | 4%                  | 20%                 | 4%                  | 8%                  | 2%              | 4%          | 36%         |             | 9%                   | 2%                 |                     | 3%                | 8%                |                     |                 |                   |
| Shaoxing-5      | 0.90                 |                     | 19%                 |                     | 18%                 | 1%              | 1%          | 57%         |             |                      |                    |                     | 1%                | 2%                |                     |                 |                   |
| Shaoxing-6      | 0.72                 |                     | 18%                 | 1%                  | 1%                  | 1%              |             | 19%         |             |                      | 14%                |                     |                   | 43%               | 0%                  | 3%              |                   |
| Shaoxing-7      | 0.91                 | 20%                 | 4%                  | 2%                  | 0%                  | 1%              | 15%         | 36%         |             | 1%                   | 15%                |                     | 0%                | 6%                |                     | 0%              |                   |
| Shaoxing-8      | 0.81                 | 30%                 | 3%                  | 2%                  | 1%                  | 2%              | 9%          | 44%         |             |                      | 3%                 |                     |                   | 6%                |                     |                 |                   |
| Shaoxing-9      | 0.82                 | 21%                 | 10%                 | 1%                  |                     | 0%              | 16%         | 3%          | 32%         | 1%                   | 5%                 | 7%                  | 0%                | 3%                |                     |                 |                   |
| Shaoxing-10     | 0.86                 | 6%                  | 7%                  | 4%                  | 0%                  | 0%              |             | 33%         |             | 1%                   | 3%                 |                     | 0%                | 7%                | 23%                 | 5%              | 8%                |
| Shaoxing-11     | 0.94                 | 14%                 | 9%                  | 5%                  | 1%                  | 1%              |             | 65%         |             | 1%                   |                    |                     | 0%                | 3%                |                     | 1%              |                   |
| Shaoxing-12     | 0.98                 | 3%                  | 9%                  | 1%                  | 0%                  | 0%              | 19%         | 62%         |             |                      |                    |                     | 1%                | 3%                | 2%                  |                 |                   |
| Shaoxing-13     | 0.92                 | 3%                  | 14%                 |                     | 0%                  | 1%              |             | 49%         |             |                      | 21%                |                     |                   | 12%               |                     |                 |                   |
| Stockholm2016-1 | 0.77                 | 1%                  | 24%                 | 3%                  | 4%                  | 2%              | 32%         | 12%         |             | 8%                   |                    |                     | 2%                | 11%               | 1%                  |                 |                   |
| Stockholm2016-2 | 0.77                 |                     | 6%                  | 7%                  | 30%                 | 5%              | 14%         | 24%         |             | 7%                   | 0%                 |                     | 5%                | 3%                |                     |                 |                   |
| Stockholm2016-3 | 0.83                 | 19%                 |                     | 8%                  | 1%                  | 4%              | 39%         | 18%         |             |                      | 8%                 |                     |                   | 3%                |                     |                 |                   |
| Stockholm2016-4 | 0.78                 |                     | 11%                 | 4%                  | 16%                 | 7%              | 19%         | 11%         |             | 8%                   | 10%                |                     | 1%                | 8%                | 4%                  |                 |                   |
| Stockholm2016-5 | 0.89                 |                     | 13%                 | 5%                  | 15%                 | 4%              | 24%         | 22%         |             |                      | 14%                |                     |                   | 3%                |                     |                 |                   |
| Stockholm2016-6 | 0.69                 |                     | 9%                  | 6%                  | 32%                 | 5%              | 15%         | 15%         |             | 6%                   |                    |                     |                   | 12%               |                     |                 |                   |
| Stockholm2016-7 | 0.75                 | 13%                 | 5%                  | 4%                  | 0%                  | 1%              | 51%         | 12%         |             | 1%                   | 6%                 |                     |                   | 8%                |                     | 0%              |                   |
| Stockholm2016-8 | 0.85                 |                     | 19%                 | 1%                  | 1%                  | 3%              | 16%         | 47%         |             | 1%                   | 8%                 |                     | 3%                | 2%                |                     |                 |                   |
| Stockholm2016-9 | 0.65                 | 20%                 | 12%                 | 7%                  | 1%                  | 2%              | 34%         | 9%          |             | 1%                   | 13%                |                     | 0%                | 0%                |                     |                 |                   |
| Stockholm2011-1 | 0.76                 | 0%                  | 12%                 | 1%                  | 4%                  | 5%              | 48%         | 8%          |             |                      | 7%                 |                     |                   | 3%                | 12%                 | 0%              |                   |
| Stockholm2011-2 | 0.86                 |                     | 9%                  | 4%                  | 13%                 | 6%              | 13%         | 39%         |             |                      | 8%                 |                     | 1%                | 5%                |                     |                 |                   |

| <i>Site</i>      | <i>R<sup>2</sup></i> | <i>SCCP 51.5%CI</i> | <i>SCCP 55.5%CI</i> | <i>SCCP 63.0%CI</i> | <i>Witacolor 149</i> | <i>Hüls 70C</i> | <i>MP42</i> | <i>MP52</i> | <i>MP57</i> | <i>Cloparin 49st</i> | <i>Cloparin 50</i> | <i>Cereclor S52</i> | <i>LCCP 36%CI</i> | <i>LCCP 49%CI</i> | <i>Witacolor 549</i> | <i>Hüls 40N</i> | <i>Uniclor 40</i> |
|------------------|----------------------|---------------------|---------------------|---------------------|----------------------|-----------------|-------------|-------------|-------------|----------------------|--------------------|---------------------|-------------------|-------------------|----------------------|-----------------|-------------------|
| Stockholm2011-3  | 0.67                 |                     | 19%                 |                     | 8%                   | 2%              | 46%         | 20%         |             |                      |                    |                     |                   |                   | 5%                   |                 |                   |
| Stockholm2011-4  | 0.78                 |                     | 16%                 | 2%                  | 13%                  | 5%              | 52%         | 8%          |             |                      |                    |                     |                   |                   | 3%                   |                 |                   |
| Stockholm2011-5  | 0.85                 | 10%                 | 4%                  | 5%                  | 1%                   | 5%              | 58%         |             |             | 0%                   | 5%                 |                     | 7%                | 5%                |                      |                 |                   |
| Stockholm2011-6  | 0.80                 | 0%                  | 22%                 | 1%                  | 2%                   | 2%              | 60%         | 5%          |             | 1%                   | 2%                 |                     | 3%                | 3%                |                      |                 |                   |
| Stockholm2011-7  | 0.72                 |                     | 17%                 | 3%                  | 16%                  | 6%              | 47%         |             |             |                      | 9%                 |                     |                   | 3%                |                      |                 |                   |
| Stockholm2011-8  | 0.76                 |                     | 18%                 | 4%                  | 21%                  | 7%              | 30%         | 7%          |             |                      | 9%                 |                     |                   | 4%                |                      |                 |                   |
| Stockholm2011-9  | 0.83                 |                     | 17%                 | 2%                  | 1%                   | 2%              | 51%         | 13%         |             | 1%                   | 6%                 |                     | 2%                | 5%                |                      |                 |                   |
| Stockholm2011-10 | 0.81                 | 15%                 | 7%                  | 6%                  | 0%                   | 1%              | 58%         | 7%          |             | 1%                   |                    |                     |                   | 0%                | 4%                   | 1%              |                   |
| Bodø-1           | 0.69                 | 0%                  | 21%                 | 3%                  | 12%                  | 12%             | 25%         | 0%          |             | 5%                   | 20%                |                     | 1%                | 1%                |                      |                 |                   |
| Bodø-2           | 0.69                 | 43%                 | 6%                  |                     | 1%                   | 1%              | 27%         | 9%          |             | 2%                   |                    |                     |                   |                   | 7%                   | 2%              |                   |
| Bodø-3           | 0.91                 | 10%                 | 6%                  | 3%                  | 0%                   | 1%              | 69%         | 5%          |             | 0%                   |                    |                     | 0%                | 5%                |                      |                 |                   |
| Bodø-4           | 0.71                 |                     | 21%                 | 3%                  | 12%                  | 5%              | 33%         | 11%         |             |                      | 10%                |                     | 2%                | 4%                |                      |                 |                   |
| Bodø-5           | 0.79                 | 0%                  | 18%                 | 5%                  | 7%                   | 8%              | 24%         | 16%         |             |                      | 15%                |                     | 5%                | 2%                |                      |                 |                   |
| Bodø-6           | 0.94                 |                     | 0%                  | 0%                  | 1%                   |                 | 0%          |             | 98%         | 0%                   |                    |                     |                   |                   |                      |                 |                   |
| Bodø-7           | 0.74                 |                     | 8%                  | 6%                  | 20%                  | 3%              | 31%         | 12%         |             | 6%                   |                    |                     | 4%                | 5%                | 4%                   |                 |                   |
| Bodø-8           | 0.89                 | 0%                  | 8%                  | 3%                  | 16%                  | 4%              | 20%         | 16%         |             | 7%                   | 21%                |                     | 2%                | 4%                |                      |                 |                   |

**Table S5.** Test statistics of Kruskal Wallis test grouped by sampling sites

| Variable   | n  | Group | Chi-Square | Asymp. Sig. | Variable   | n  | Group | Chi-Square | Asymp. Sig. |
|------------|----|-------|------------|-------------|------------|----|-------|------------|-------------|
| C9H18C12   | 63 | 6     | 0.000      | 1.000       | C13H20C18  | 63 | 6     | 20.954     | 0.001       |
| C9H17C13   | 63 | 6     | 5.713      | 0.335       | C13H19C19  | 63 | 6     | 1.960      | 0.855       |
| C9H16C14   | 63 | 6     | 29.358     | 0.000       | C13H18C110 | 63 | 6     | 0.926      | 0.968       |
| C9H15C15   | 63 | 6     | 37.739     | 0.000       | C13H17C111 | 63 | 6     | 11.876     | 0.037       |
| C9H14C16   | 63 | 6     | 19.131     | 0.002       | C13H16C112 | 63 | 6     | 4.098      | 0.535       |
| C9H13C17   | 63 | 6     | 9.516      | 0.090       | C13H15C113 | 63 | 6     | 0.000      | 1.000       |
| C9H12C18   | 63 | 6     | 15.326     | 0.009       | C13H14C114 | 63 | 6     | 0.000      | 1.000       |
| C9H11C19   | 63 | 6     | 5.581      | 0.349       | C14H28C12  | 63 | 6     | 5.395      | 0.370       |
| C10H19C13  | 63 | 6     | 5.867      | 0.319       | C14H27C13  | 63 | 6     | 32.074     | 0.000       |
| C10H18C14  | 63 | 6     | 20.874     | 0.001       | C14H26C14  | 63 | 6     | 35.749     | 0.000       |
| C10H17C15  | 63 | 6     | 29.952     | 0.000       | C14H25C15  | 63 | 6     | 17.953     | 0.003       |
| C10H16C16  | 63 | 6     | 29.665     | 0.000       | C14H24C16  | 63 | 6     | 11.656     | 0.040       |
| C10H15C17  | 63 | 6     | 20.173     | 0.001       | C14H23C17  | 63 | 6     | 20.008     | 0.001       |
| C10H14C18  | 63 | 6     | 7.191      | 0.207       | C14H22C18  | 63 | 6     | 18.250     | 0.003       |
| C10H13C19  | 63 | 6     | 12.523     | 0.028       | C14H21C19  | 63 | 6     | 8.412      | 0.135       |
| C10H12C110 | 63 | 6     | 8.689      | 0.122       | C14H20C110 | 63 | 6     | 0.771      | 0.979       |
| C10H11C111 | 63 | 6     | 14.639     | 0.012       | C14H19C111 | 63 | 6     | 9.475      | 0.092       |
| C10H10C112 | 63 | 6     | 5.874      | 0.319       | C14H18C112 | 63 | 6     | 5.146      | 0.398       |
| C11H21C13  | 63 | 6     | 6.433      | 0.266       | C14H17C113 | 63 | 6     | 0.000      | 1.000       |
| C11H20C14  | 63 | 6     | 15.205     | 0.010       | C14H16C114 | 63 | 6     | 0.000      | 1.000       |
| C11H19C15  | 63 | 6     | 16.935     | 0.005       | C15H30C12  | 63 | 6     | 5.022      | 0.413       |
| C11H18C16  | 63 | 6     | 9.015      | 0.108       | C15H29C13  | 63 | 6     | 31.925     | 0.000       |
| C11H17C17  | 63 | 6     | 9.380      | 0.095       | C15H28C14  | 63 | 6     | 35.439     | 0.000       |
| C11H16C18  | 63 | 6     | 27.270     | 0.000       | C15H27C15  | 63 | 6     | 30.044     | 0.000       |
| C11H15C19  | 63 | 6     | 16.512     | 0.006       | C15H26C16  | 63 | 6     | 5.784      | 0.328       |
| C11H14C110 | 63 | 6     | 28.552     | 0.000       | C15H25C17  | 63 | 6     | 7.797      | 0.168       |
| C11H13C111 | 63 | 6     | 6.655      | 0.248       | C15H24C18  | 63 | 6     | 7.308      | 0.199       |
| C11H12C112 | 63 | 6     | 1.341      | 0.931       | C15H23C19  | 63 | 6     | 1.312      | 0.934       |
| C12H24C12  | 63 | 6     | 10.936     | 0.053       | C15H22C110 | 63 | 6     | 1.693      | 0.890       |
| C12H23C13  | 63 | 6     | 2.176      | 0.824       | C15H21C111 | 63 | 6     | 5.566      | 0.351       |
| C12H22C14  | 63 | 6     | 6.856      | 0.232       | C15H20C112 | 63 | 6     | 5.540      | 0.354       |
| C12H21C15  | 63 | 6     | 6.190      | 0.288       | C15H19C113 | 63 | 6     | 0.000      | 1.000       |
| C12H20C16  | 63 | 6     | 2.448      | 0.784       | C15H18C114 | 63 | 6     | 0.000      | 1.000       |
| C12H19C17  | 63 | 6     | 3.448      | 0.631       | C16H32C12  | 63 | 6     | 0.000      | 1.000       |
| C12H18C18  | 63 | 6     | 2.449      | 0.784       | C16H31C13  | 63 | 6     | 16.401     | 0.006       |
| C12H17C19  | 63 | 6     | 3.632      | 0.604       | C16H30C14  | 63 | 6     | 31.864     | 0.000       |
| C12H16C110 | 63 | 6     | 10.064     | 0.073       | C16H29C15  | 63 | 6     | 25.621     | 0.000       |
| C12H15C111 | 63 | 6     | 3.936      | 0.559       | C16H28C16  | 63 | 6     | 5.787      | 0.327       |
| C12H14C112 | 63 | 6     | 6.970      | 0.223       | C16H27C17  | 63 | 6     | 6.023      | 0.304       |
| C12H13C113 | 63 | 6     | 0.000      | 1.000       | C16H26C18  | 63 | 6     | 4.859      | 0.433       |
| C12H12C114 | 63 | 6     | 0.000      | 1.000       | C16H25C19  | 63 | 6     | 10.717     | 0.057       |
| C13H26C12  | 63 | 6     | 8.453      | 0.133       | C16H24C110 | 63 | 6     | 0.755      | 0.980       |
| C13H25C13  | 63 | 6     | 5.843      | 0.322       | C16H23C111 | 63 | 6     | 7.377      | 0.194       |
| C13H24C14  | 63 | 6     | 9.835      | 0.080       | C16H22C112 | 63 | 6     | 0.889      | 0.971       |
| C13H23C15  | 63 | 6     | 5.896      | 0.317       | C16H21C113 | 63 | 6     | 0.000      | 1.000       |
| C13H22C16  | 63 | 6     | 11.402     | 0.044       | C16H20C114 | 63 | 6     | 0.000      | 1.000       |
| C13H21C17  | 63 | 6     | 20.075     | 0.001       | C17H34C12  | 63 | 6     | 0.000      | 1.000       |

**Table S5.** (Cont.) Test statistics of Kruskal Wallis Test grouped by sampling sites

| Variable   | n  | Group | Chi-Square | Asymp. Sig. | Variable   | n  | Group | Chi-Square | Asymp. Sig. |
|------------|----|-------|------------|-------------|------------|----|-------|------------|-------------|
| C17H33CI3  | 63 | 6     | 6.698      | 0.244       | C20H31CI11 | 63 | 6     | 6.267      | 0.281       |
| C17H32CI4  | 63 | 6     | 17.194     | 0.004       | C20H30CI12 | 63 | 6     | 4.595      | 0.467       |
| C17H31CI5  | 63 | 6     | 16.034     | 0.007       | C20H29CI13 | 63 | 6     | 0.000      | 1.000       |
| C17H30CI6  | 63 | 6     | 7.506      | 0.186       | C20H28CI14 | 63 | 6     | 0.000      | 1.000       |
| C17H29CI7  | 63 | 6     | 2.656      | 0.753       | C21H42CI2  | 63 | 6     | 0.000      | 1.000       |
| C17H28CI8  | 63 | 6     | 3.752      | 0.586       | C21H41CI3  | 63 | 6     | 9.574      | 0.088       |
| C17H27CI9  | 63 | 6     | 8.487      | 0.131       | C21H40CI4  | 63 | 6     | 7.555      | 0.183       |
| C17H26CI10 | 63 | 6     | 2.888      | 0.717       | C21H39CI5  | 63 | 6     | 4.445      | 0.487       |
| C17H25CI11 | 63 | 6     | 1.515      | 0.911       | C21H38CI6  | 63 | 6     | 7.976      | 0.158       |
| C17H24CI12 | 63 | 6     | 5.935      | 0.313       | C21H37CI7  | 63 | 6     | 2.672      | 0.750       |
| C17H23CI13 | 63 | 6     | 0.000      | 1.000       | C21H36CI8  | 63 | 6     | 2.558      | 0.768       |
| C17H22CI14 | 63 | 6     | 0.000      | 1.000       | C21H35CI9  | 63 | 6     | 6.550      | 0.256       |
| C18H36CI2  | 63 | 6     | 0.000      | 1.000       | C21H34CI10 | 63 | 6     | 2.879      | 0.719       |
| C18H35CI3  | 63 | 6     | 2.708      | 0.745       | C21H33CI11 | 63 | 6     | 12.207     | 0.032       |
| C18H34CI4  | 63 | 6     | 3.314      | 0.652       | C21H32CI12 | 63 | 6     | 5.743      | 0.332       |
| C18H33CI5  | 63 | 6     | 8.847      | 0.115       | C21H31CI13 | 63 | 6     | 0.000      | 1.000       |
| C18H32CI6  | 63 | 6     | 12.606     | 0.027       | C21H30CI14 | 63 | 6     | 0.000      | 1.000       |
| C18H31CI7  | 63 | 6     | 9.694      | 0.084       | C22H44CI2  | 63 | 6     | 3.846      | 0.572       |
| C18H30CI8  | 63 | 6     | 6.147      | 0.292       | C22H43CI3  | 63 | 6     | 4.143      | 0.529       |
| C18H29CI9  | 63 | 6     | 3.138      | 0.679       | C22H42CI4  | 63 | 6     | 4.516      | 0.478       |
| C18H28CI10 | 63 | 6     | 5.837      | 0.322       | C22H41CI5  | 63 | 6     | 5.743      | 0.332       |
| C18H27CI11 | 63 | 6     | 2.992      | 0.701       | C22H40CI6  | 63 | 6     | 5.673      | 0.339       |
| C18H26CI12 | 63 | 6     | 6.061      | 0.300       | C22H39CI7  | 63 | 6     | 5.743      | 0.332       |
| C18H25CI13 | 63 | 6     | 0.000      | 1.000       | C22H38CI8  | 63 | 6     | 5.673      | 0.339       |
| C18H24CI14 | 63 | 6     | 0.000      | 1.000       | C22H37CI9  | 63 | 6     | 5.673      | 0.339       |
| C19H38CI2  | 63 | 6     | 0.000      | 1.000       | C22H36CI10 | 63 | 6     | 3.656      | 0.600       |
| C19H37CI3  | 63 | 6     | 2.594      | 0.762       | C22H35CI11 | 63 | 6     | 3.609      | 0.607       |
| C19H36CI4  | 63 | 6     | 7.863      | 0.164       | C22H34CI12 | 63 | 6     | 3.609      | 0.607       |
| C19H35CI5  | 63 | 6     | 6.478      | 0.262       | C22H33CI13 | 63 | 6     | 0.000      | 1.000       |
| C19H34CI6  | 63 | 6     | 8.537      | 0.129       | C22H32CI14 | 63 | 6     | 0.000      | 1.000       |
| C19H33CI7  | 63 | 6     | 12.985     | 0.024       | C23H46CI2  | 63 | 6     | 3.846      | 0.572       |
| C19H32CI8  | 63 | 6     | 7.590      | 0.180       | C23H45CI3  | 63 | 6     | 0.000      | 1.000       |
| C19H31CI9  | 63 | 6     | 3.403      | 0.638       | C23H44CI4  | 63 | 6     | 3.846      | 0.572       |
| C19H30CI10 | 63 | 6     | 3.287      | 0.656       | C23H43CI5  | 63 | 6     | 3.609      | 0.607       |
| C19H29CI11 | 63 | 6     | 5.069      | 0.407       | C23H42CI6  | 63 | 6     | 7.816      | 0.167       |
| C19H28CI12 | 63 | 6     | 4.624      | 0.463       | C23H41CI7  | 63 | 6     | 5.821      | 0.324       |
| C19H27CI13 | 63 | 6     | 0.000      | 1.000       | C23H40CI8  | 63 | 6     | 7.816      | 0.167       |
| C19H26CI14 | 63 | 6     | 0.000      | 1.000       | C23H39CI9  | 63 | 6     | 5.743      | 0.332       |
| C20H40CI2  | 63 | 6     | 0.000      | 1.000       | C23H38CI10 | 63 | 6     | 3.656      | 0.600       |
| C20H39CI3  | 63 | 6     | 1.651      | 0.895       | C23H37CI11 | 63 | 6     | 3.846      | 0.572       |
| C20H38CI4  | 63 | 6     | 6.531      | 0.258       | C23H36CI12 | 63 | 6     | 3.846      | 0.572       |
| C20H37CI5  | 63 | 6     | 7.529      | 0.184       | C23H35CI13 | 63 | 6     | 0.000      | 1.000       |
| C20H36CI6  | 63 | 6     | 6.710      | 0.243       | C23H34CI14 | 63 | 6     | 0.000      | 1.000       |
| C20H35CI7  | 63 | 6     | 11.314     | 0.045       | C24H48CI2  | 63 | 6     | 5.300      | 0.380       |
| C20H34CI8  | 63 | 6     | 5.255      | 0.386       | C24H47CI3  | 63 | 6     | 3.656      | 0.600       |
| C20H33CI9  | 63 | 6     | 3.644      | 0.602       | C24H46CI4  | 63 | 6     | 3.609      | 0.607       |
| C20H32CI10 | 63 | 6     | 4.896      | 0.429       | C24H45CI5  | 63 | 6     | 7.816      | 0.167       |

**Table S5.** (Cont.) Test statistics of Kruskal Wallis Test grouped by sampling sites

| Variable   | n  | Group | Chi-Square | Asymp. Sig. | Variable   | n  | Group | Chi-Square | Asymp. Sig. |
|------------|----|-------|------------|-------------|------------|----|-------|------------|-------------|
| C24H44C16  | 63 | 6     | 3.846      | 0.572       | C26H43C11  | 63 | 6     | 0.000      | 1.000       |
| C24H43C17  | 63 | 6     | 5.743      | 0.332       | C26H42C112 | 63 | 6     | 3.846      | 0.572       |
| C24H42C18  | 63 | 6     | 7.816      | 0.167       | C26H41C113 | 63 | 6     | 0.000      | 1.000       |
| C24H41C19  | 63 | 6     | 7.816      | 0.167       | C26H40C114 | 63 | 6     | 0.000      | 1.000       |
| C24H40C110 | 63 | 6     | 7.816      | 0.167       | C26H39C115 | 63 | 6     | 0.000      | 1.000       |
| C24H39C111 | 63 | 6     | 3.846      | 0.572       | C27H54C12  | 63 | 6     | 5.146      | 0.398       |
| C24H38C112 | 63 | 6     | 7.816      | 0.167       | C27H53C13  | 63 | 6     | 2.952      | 0.707       |
| C24H37C113 | 63 | 6     | 0.000      | 1.000       | C27H52C14  | 63 | 6     | 3.846      | 0.572       |
| C24H36C114 | 63 | 6     | 0.000      | 1.000       | C27H51C15  | 63 | 6     | 3.846      | 0.572       |
| C25H50C12  | 63 | 6     | 0.000      | 1.000       | C27H50C16  | 63 | 6     | 3.846      | 0.572       |
| C25H49C13  | 63 | 6     | 0.000      | 1.000       | C27H49C17  | 63 | 6     | 3.846      | 0.572       |
| C25H48C14  | 63 | 6     | 3.846      | 0.572       | C27H48C18  | 63 | 6     | 3.846      | 0.572       |
| C25H47C15  | 63 | 6     | 0.000      | 1.000       | C27H47C19  | 63 | 6     | 3.846      | 0.572       |
| C25H46C16  | 63 | 6     | 7.816      | 0.167       | C27H46C110 | 63 | 6     | 3.846      | 0.572       |
| C25H45C17  | 63 | 6     | 2.442      | 0.785       | C27H45C111 | 63 | 6     | 3.846      | 0.572       |
| C25H44C18  | 63 | 6     | 7.816      | 0.167       | C27H44C112 | 63 | 6     | 3.846      | 0.572       |
| C25H43C19  | 63 | 6     | 7.816      | 0.167       | C27H43C113 | 63 | 6     | 0.000      | 1.000       |
| C25H42C110 | 63 | 6     | 7.816      | 0.167       | C27H52C14  | 63 | 6     | 3.846      | 0.572       |
| C25H41C111 | 63 | 6     | 3.846      | 0.572       | C27H51C15  | 63 | 6     | 3.846      | 0.572       |
| C25H40C112 | 63 | 6     | 7.816      | 0.167       | C27H50C16  | 63 | 6     | 3.846      | 0.572       |
| C25H39C113 | 63 | 6     | 0.000      | 1.000       | C27H49C17  | 63 | 6     | 3.846      | 0.572       |
| C25H38C114 | 63 | 6     | 0.000      | 1.000       | C27H48C18  | 63 | 6     | 3.846      | 0.572       |
| C26H52C12  | 63 | 6     | 3.846      | 0.572       | C27H47C19  | 63 | 6     | 3.846      | 0.572       |
| C26H51C13  | 63 | 6     | 0.000      | 1.000       | C27H46C110 | 63 | 6     | 3.846      | 0.572       |
| C26H50C14  | 63 | 6     | 3.846      | 0.572       | C27H45C111 | 63 | 6     | 3.846      | 0.572       |
| C26H49C15  | 63 | 6     | 3.846      | 0.572       | C27H44C112 | 63 | 6     | 3.846      | 0.572       |
| C26H48C16  | 63 | 6     | 0.000      | 1.000       | C27H43C113 | 63 | 6     | 0.000      | 1.000       |
| C26H47C17  | 63 | 6     | 3.846      | 0.572       | C27H42C114 | 63 | 6     | 0.000      | 1.000       |
| C26H46C18  | 63 | 6     | 0.000      | 1.000       | C27H41C115 | 63 | 6     | 0.000      | 1.000       |
| C26H45C19  | 63 | 6     | 3.846      | 0.572       | C27H40C116 | 63 | 6     | 0.000      | 1.000       |
| C26H44C110 | 63 | 6     | 0.000      | 1.000       |            |    |       |            |             |

**Table S6.** Estimated daily intake [EDI, ng (kg BW)<sup>-1</sup> day<sup>-1</sup>] of CPs via breast-feeding of infants, and margin of exposure (MOE, dimensionless).<sup>7</sup>

|                                                   | China<br>n=36       | Sweden<br>n=20 | Norway<br>n=8 |         |
|---------------------------------------------------|---------------------|----------------|---------------|---------|
| Mean concentration (ng g fat <sup>-1</sup> )      |                     |                |               |         |
| SCCPs                                             | 124                 | 12.8           | 23.4          |         |
| MCCPs                                             | 146                 | 33.3           | 72.8          |         |
| LCCPs                                             | 19.1                | 4.89           | 6.97          |         |
| EDI (ng (kg BW) <sup>-1</sup> day <sup>-1</sup> ) |                     |                |               |         |
| SCCPs                                             | average consumption | 570            | 58.7          | 107     |
|                                                   | high consumption    | 856            | 88.0          | 161     |
| MCCPs                                             | average consumption | 669            | 153           | 334     |
|                                                   | high consumption    | 1000           | 229           | 501     |
| LCCPs                                             | average consumption | 87.7           | 22.4          | 32.0    |
|                                                   | high consumption    | 132            | 33.6          | 48.0    |
| MOE (EU)                                          |                     |                |               |         |
| SCCPs                                             | average consumption | 4030           | 39200         | 21400   |
|                                                   | high consumption    | 2690           | 26100         | 14300   |
| MCCPs                                             | average consumption | 53800          | 236000        | 108000  |
|                                                   | high consumption    | 35900          | 157000        | 71800   |
| MOE (ECCC)                                        |                     |                |               |         |
| MCCPs                                             | average consumption | 8970           | 39300         | 18000   |
|                                                   | high consumption    | 5980           | 26200         | 12000   |
| LCCPs                                             | average consumption | 810000         | 3170000       | 2220000 |
|                                                   | high consumption    | 540000         | 2110000       | 1480000 |

The EDI was estimated based on the calculation method given in EFSA (2019), and the BMDL<sub>10</sub> value for SCCPs and MCCPs proposed by EFSA is 2.3 and 36 mg (kg BW)<sup>-1</sup> day<sup>-1</sup>, respectively.<sup>7</sup> The LOEL value for MCCPs and LCCPs, respectively, proposed by Environment and Climate Change Canada, is 6 and 71 mg (kg BW)<sup>-1</sup> day<sup>-1</sup>.<sup>8</sup>

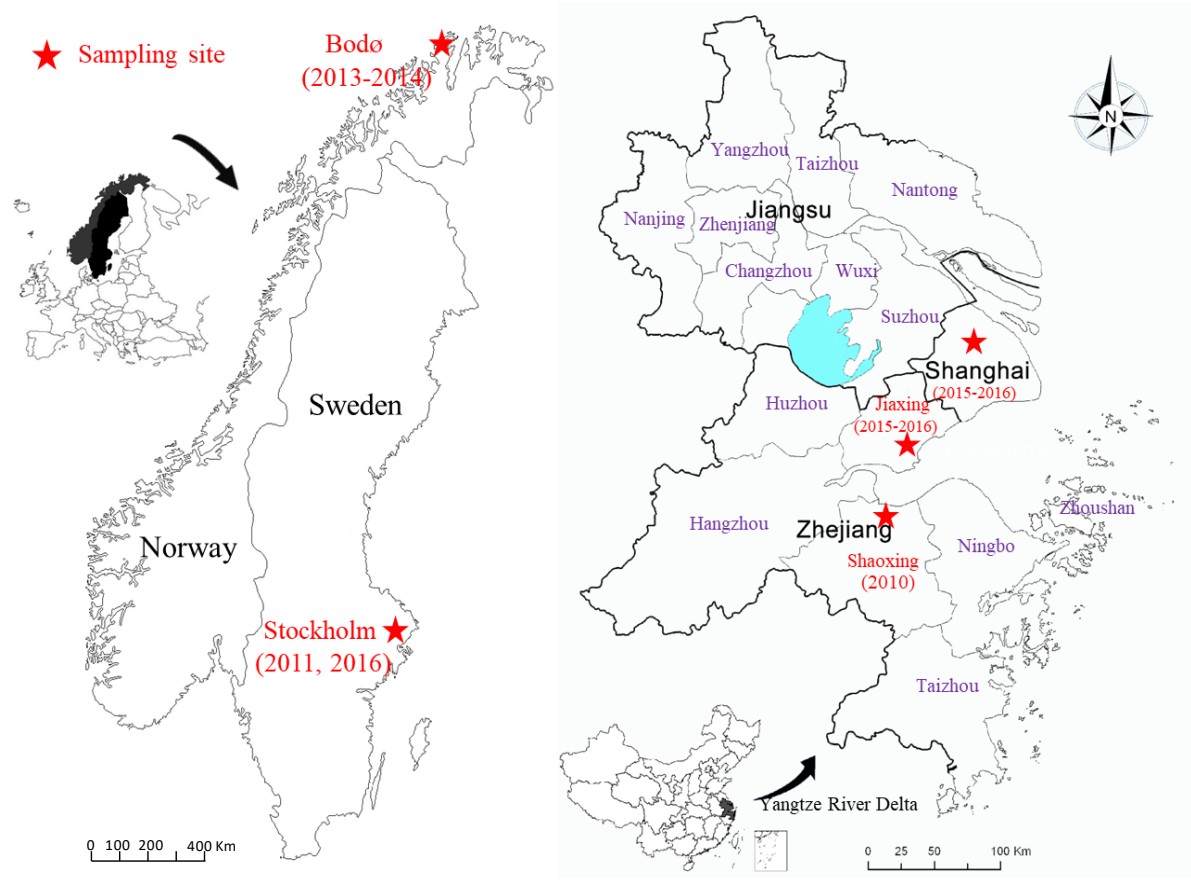

**Figure S1.** Map of sampling sites and sampling years. Left) map of Norway and Sweden, samples were collected in Bodø in 2014 and in Stockholm in 2011 and 2016. Right) map of the Yangtze River Delta, China, samples were collected in Shanghai in 2015-2016, Jiaxing in 2015-2016, and Shaoxing in 2010.



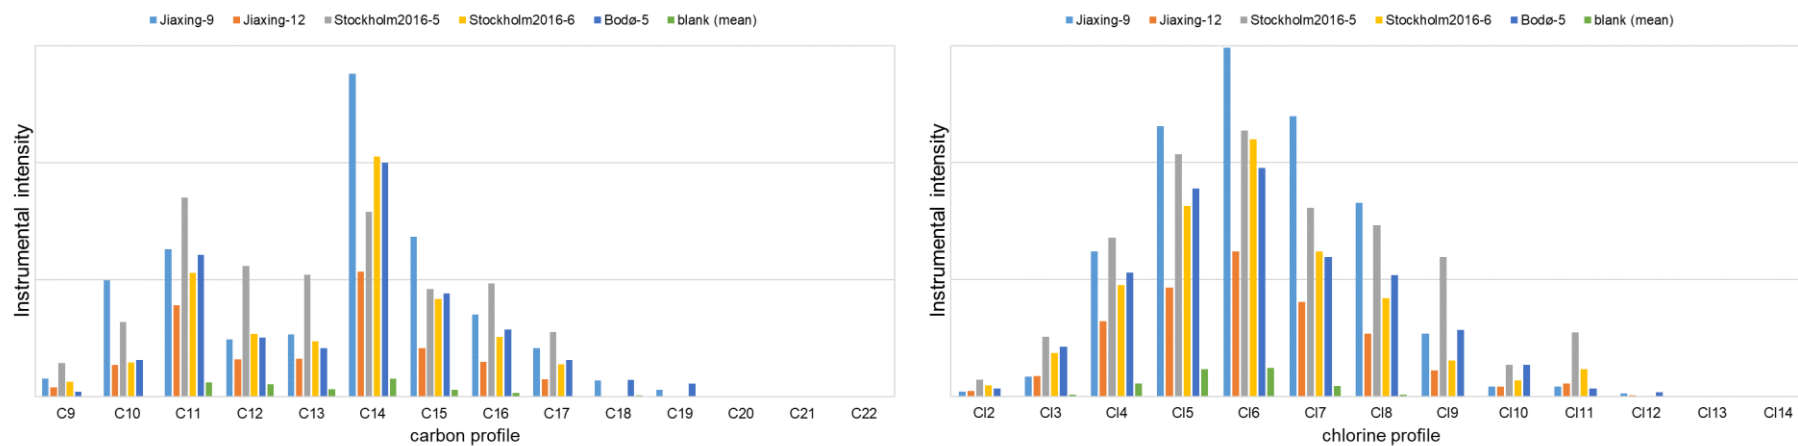

**Figure S2.** Comparisons of carbon and chlorine profiles between blank (mean) and samples with CP concentrations between LOD and LOQ. There are five samples, consisting of two Chinese, two Swedish, and one Norwegian samples. The instrumental intensities of C- and Cl-homologues in the five samples are higher than in the mean blank by an average factor of 10 for both C<sub>11-14</sub> and Cl<sub>4-7</sub> homologues.

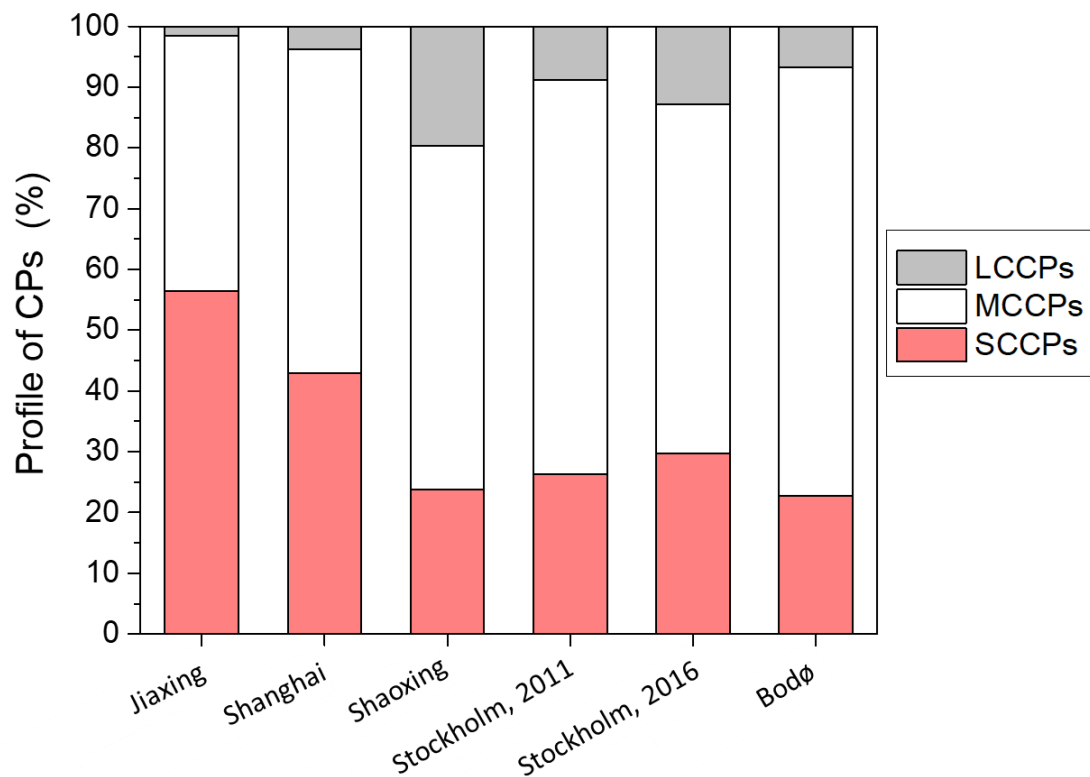

**Figure S3.** Composition profiles of SCCPs, MCCPs, and LCCPs in human milk from Jiaxing, Shanghai, and Shaoxing in China, Stockholm in Sweden, and Bodø in Norway.

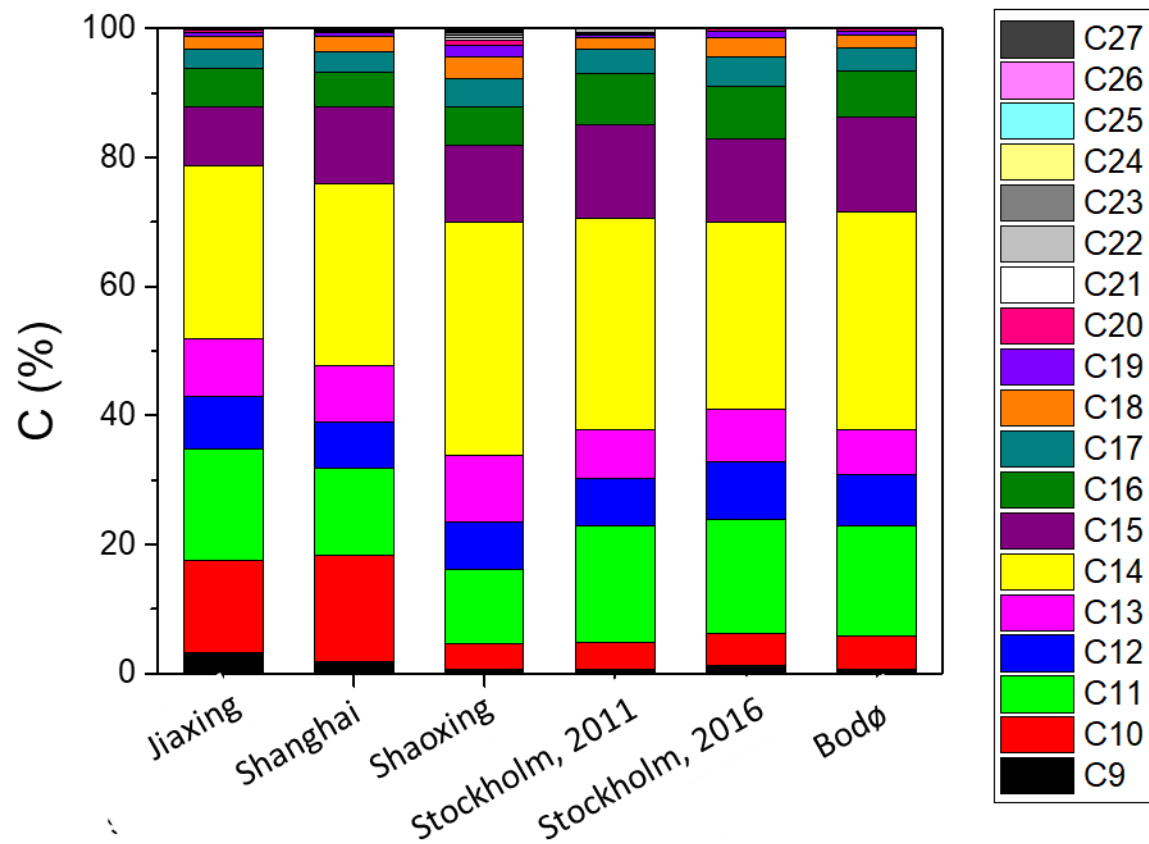

**Figure S4.** Compositional profiles of carbon chain homologs among the CPs assessed showing the occurrence of C<sub>9-27</sub>.

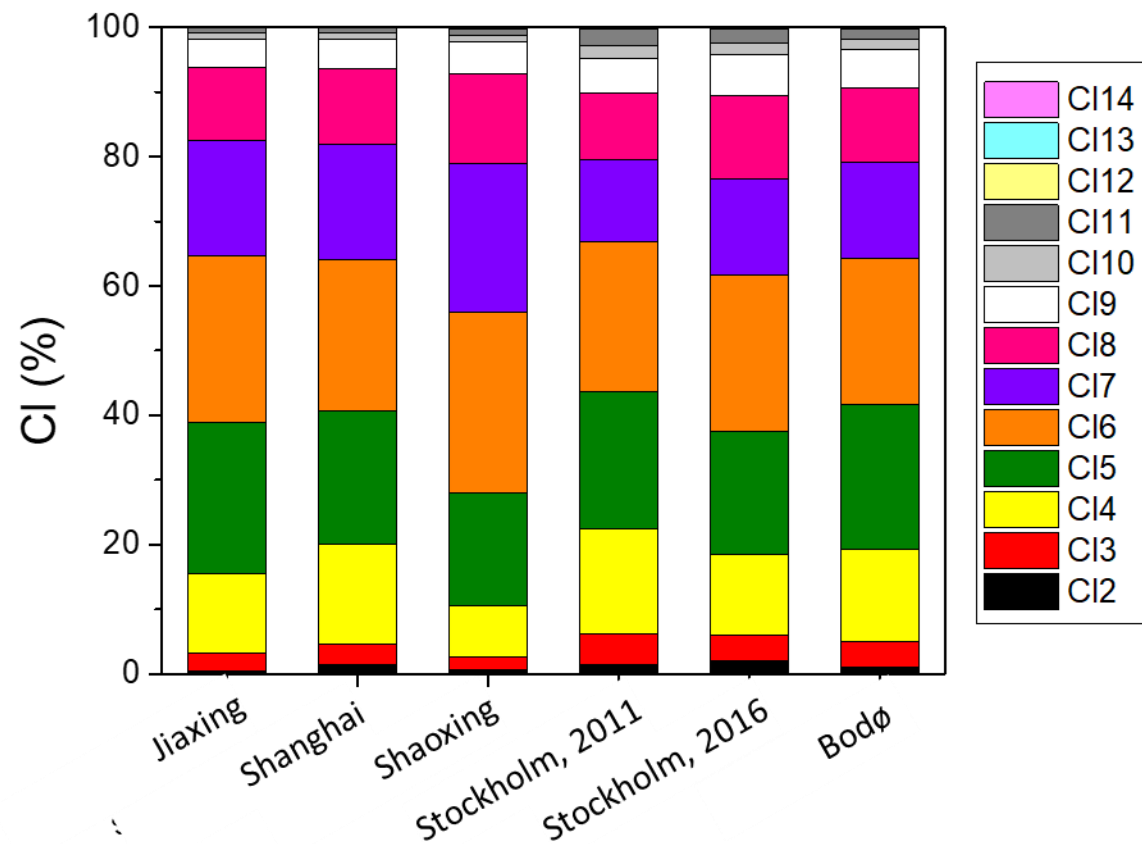

**Figure S5** Compositional profiles of the chlorine homolog series of CPs assessed showing Cl<sub>2-14</sub> in mothers' milk from Jiaxing, Shanghai, Shaoxing, Stockholm, and Bodø.

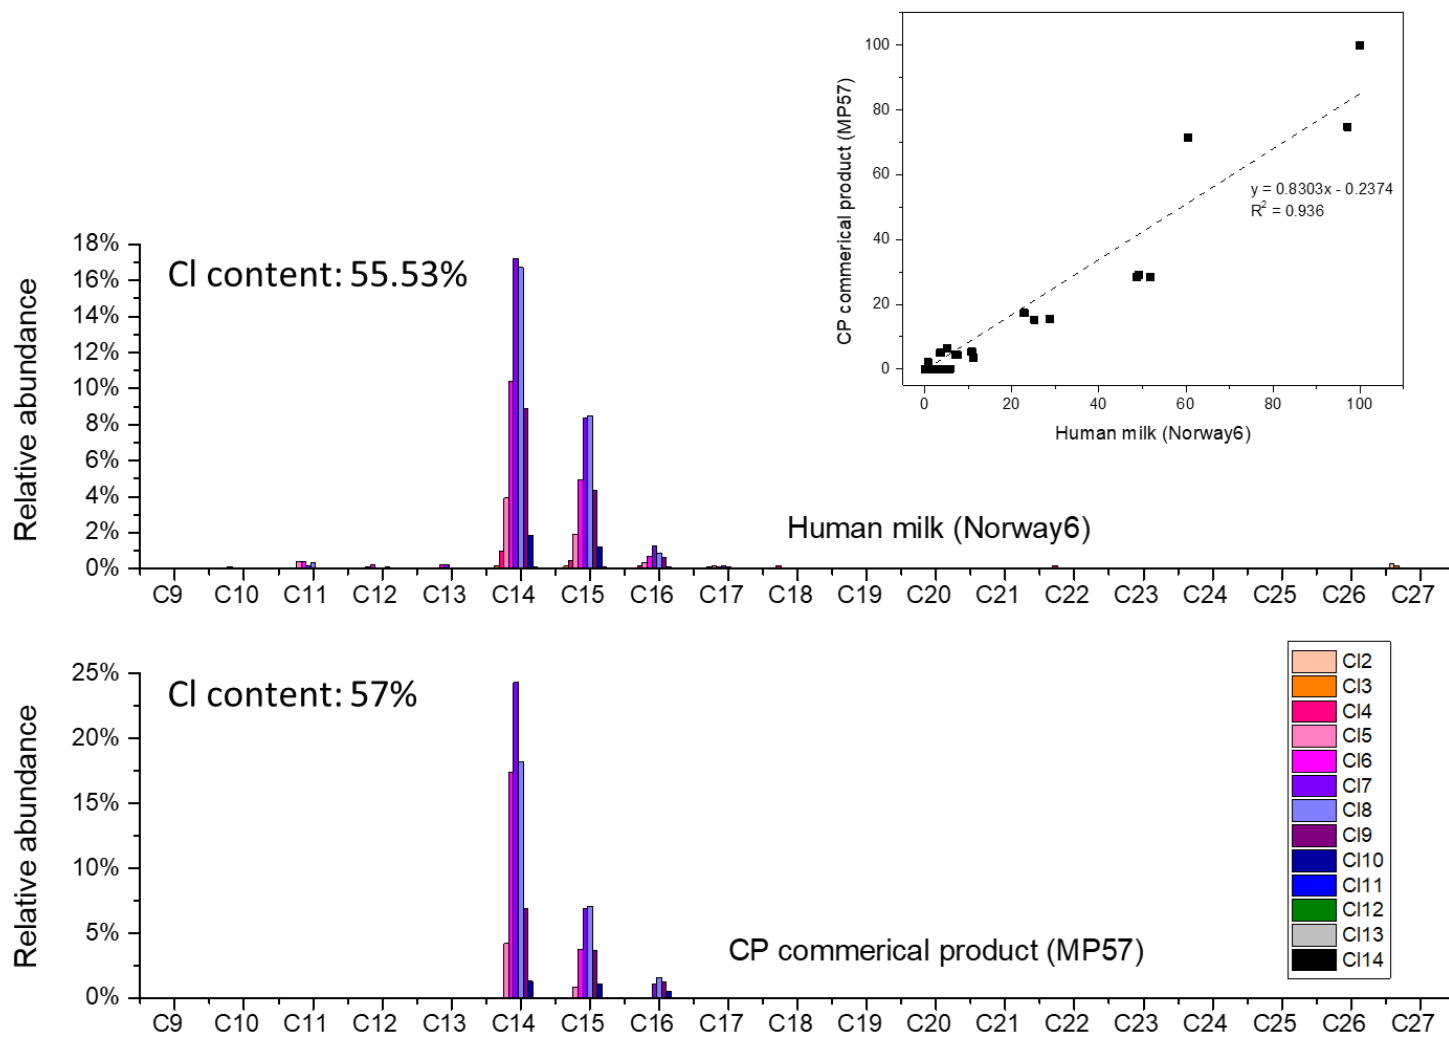

**Figure S6.** Congener group patterns of chlorinated paraffins (CPs) in one human milk sample (Bodø-6) from Norway and one CP commercial product (MP57) from the European market. The diagram in the upper right corner showed a significant positive correlation ( $R^2=0.94$ ,  $p<0.01$ ) between Bodø-6 and MP57.

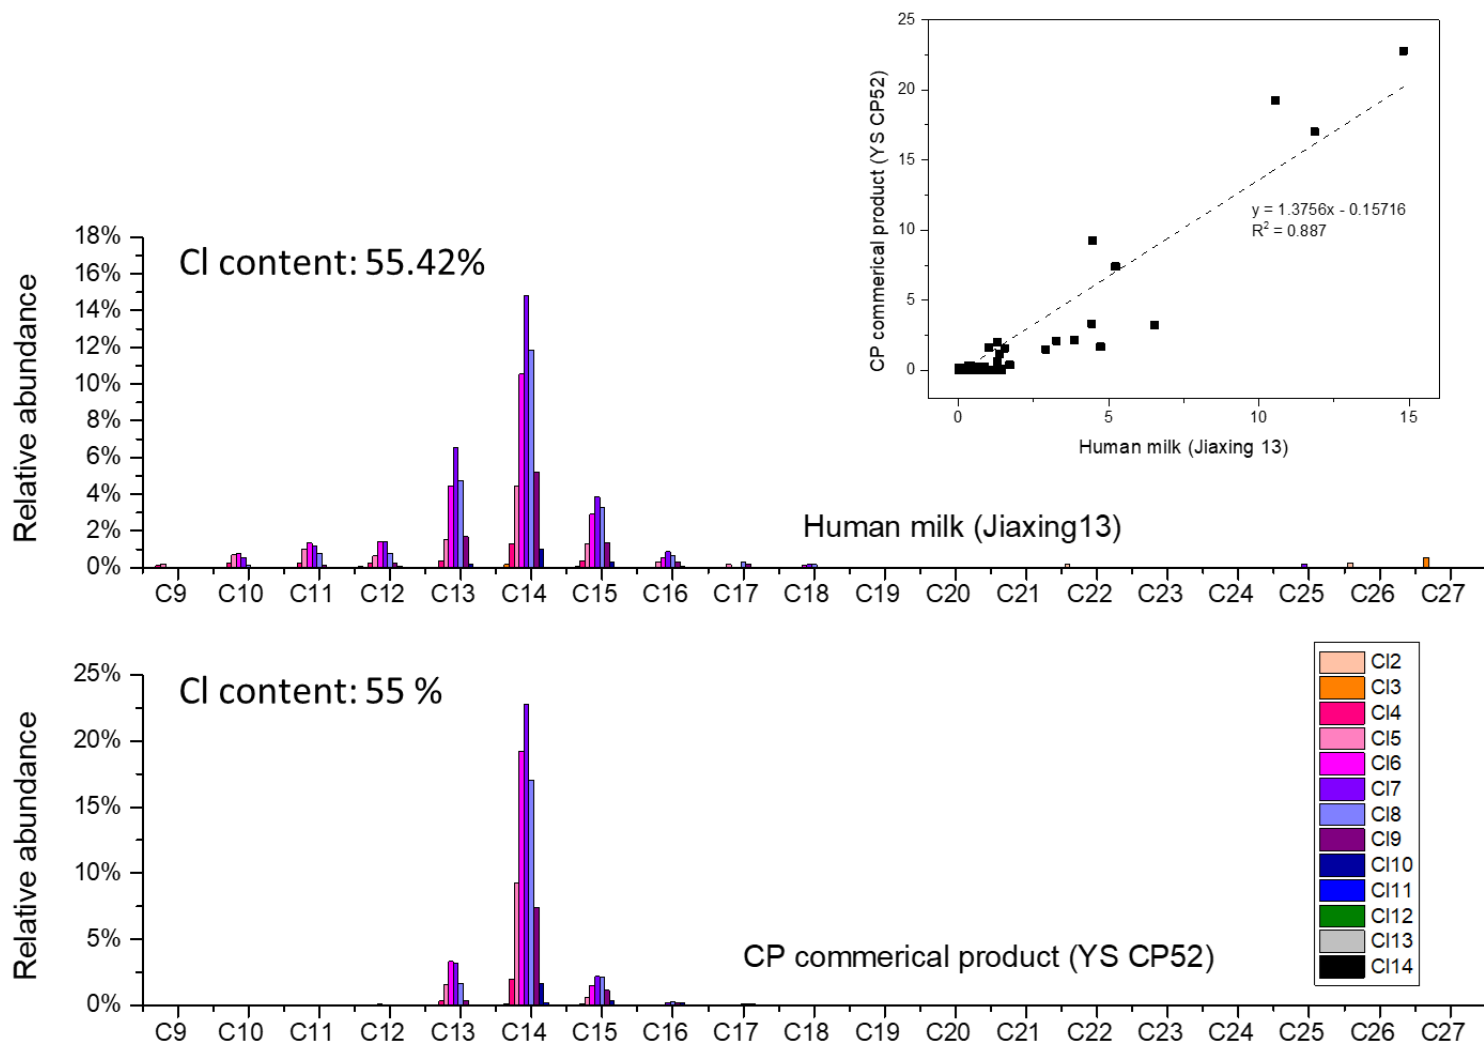

**Figure S7.** Congener group patterns of chlorinated paraffins (CPs) in one human milk sample (Jiaxing-12) from Jiaxing, China and one CP commercial product (YS CP52) from the Chinese market. The diagram in upper right corner showed a significant positive correlation ( $R^2=0.89$ ,  $p<0.01$ ) between Jiaxing-12 and YS CP52).

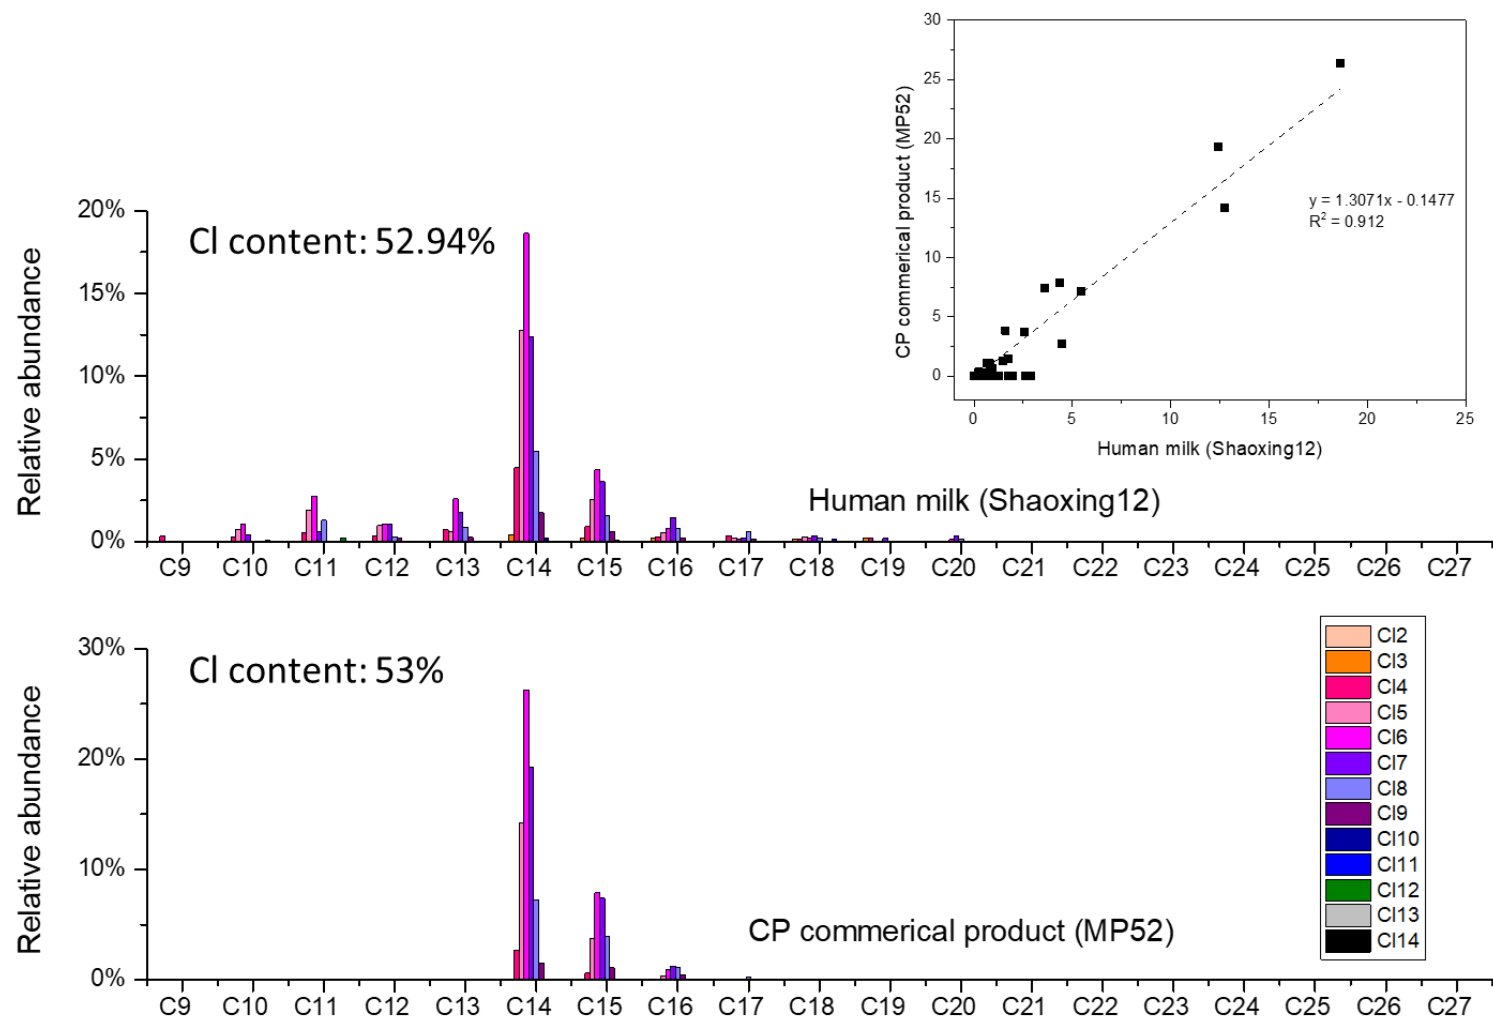

**Figure S8.** Congener group patterns of chlorinated paraffins (CPs) in one human milk sample (Shaoxing-12) from Shaoxing, China and one CP commercial product (MP52) from the European market. The diagram in the upper right corner showed a significant positive correlation ( $R^2=0.91$ ,  $p<0.01$ ) Shaoxing-12 and MP52.

## References

1. Fångström, B.; Strid, A.; Grandjean, P.; Weihe, P.; Bergman, Å., A retrospective study of PBDEs and PCBs in human milk from the Faroe Islands. *Environ. Health-Glob* **2005**, *4*, (1), 12.
2. Zhou, Y. H.; Asplund, L.; Yin, G.; Athanassiadis, I.; Wideqvist, U.; Bignert, A.; Qiu, Y. L.; Zhu, Z. L.; Zhao, J. F.; Bergman, A., Extensive organohalogen contamination in wildlife from a site in the Yangtze River Delta. *Sci. Total Environ.* **2016**, *554*, 320-328.
3. Du, X.; Yuan, B.; Zhou, Y.; Benskin, J. P.; Qiu, Y.; Yin, G.; Zhao, J., Short-, Medium-, and Long-Chain Chlorinated Paraffins in Wildlife from Paddy Fields in the Yangtze River Delta. *Environ. Sci. Technol.* **2018**, *52*, (3), 1072-1080.
4. Bogdal, C.; Alsberg, T.; Diefenbacher, P. S.; MacLeod, M.; Berger, U., Fast quantification of chlorinated paraffins in environmental samples by direct injection high-resolution mass spectrometry with pattern deconvolution. *Anal. Chem.* **2015**, *87*, (5), 2852-60.
5. Yuan, B.; Brüchert, V.; Sobek, A.; de Wit, C. A., Temporal Trends of C8–C36 Chlorinated Paraffins in Swedish Coastal Sediment Cores over the Past 80 Years. *Environ. Sci. Technol.* **2017**, *51*, (24), 14199-14208.
6. Brandsma, S. H.; van Mourik, L.; O'Brien, J. W.; Eaglesham, G.; Leonards, P. E.; de Boer, J.; Gallen, C.; Mueller, J.; Gaus, C.; Bogdal, C., Medium-Chain Chlorinated Paraffins (CPs) Dominate in Australian Sewage Sludge. *Environ. Sci. Technol.* **2017**, *51*, (6), 3364-3372.
7. EFSA, Scientific opinion on the risk for animal and human health related to the presence of chlorinated paraffins in feed and food.  
[https://www.efsa.europa.eu/sites/default/files/consultation/consultation/EFSA\\_CONTAM\\_Chlorinated\\_paraffins.pdf](https://www.efsa.europa.eu/sites/default/files/consultation/consultation/EFSA_CONTAM_Chlorinated_paraffins.pdf). [accessed: 16 November 2019]. 2019.
8. EnvironmentCanada, Canadian Environmental Protection Act: priority substances list assessment report chlorinated paraffins.  
[http://www.hc-sc.gc.ca/ewh-semt/alt\\_formats/hecs-sesc/pdf/pubs/contaminants/psl1-lsp1/paraffins-paraffines/paraffins-paraffines-eng.pdf](http://www.hc-sc.gc.ca/ewh-semt/alt_formats/hecs-sesc/pdf/pubs/contaminants/psl1-lsp1/paraffins-paraffines/paraffins-paraffines-eng.pdf) [accessed: 27 February 2019]. Canada. 1993.
